Anesthesiology  
65:346, 1986

### Bupivacaine Cardiotoxicity Is Related to Increased Brain Sensitivity

*To the Editor:*—We are puzzled by one of the conclusions reached by Morishima *et al.* in their study of bupivacaine toxicity in pregnant and nonpregnant ewes.<sup>1</sup> They found that pregnant ewes suffered circulatory collapse at a significantly lower total dose and blood level of bupivacaine than nonpregnant ewes. In their discussion, the authors state, "The cardiac tissue/blood concentration ratio of bupivacaine was approximately 3.5 in nonpregnant ewes and 3.3 in pregnant ewes." They go on to suggest that in pregnancy, "enhanced cardiotoxicity may be related to greater sensitivity of the myocardium." However, the data presented in their paper do not support this conclusion. The blood concentration of bupivacaine at circulatory collapse was  $5.5 \text{ mg} \cdot \text{ml}^{-1}$  in pregnant ewes and  $8.0 \text{ mg} \cdot \text{ml}^{-1}$  in nonpregnant ewes ( $P < 0.05$ ). The cardiac tissue concentrations at circulatory collapse (derived from fig. 4) were:  $19 \text{ mg} \cdot \text{g}^{-1}$  in pregnant ewes *versus*  $25 \text{ mg} \cdot \text{g}^{-1}$  in nonpregnant ewes (NS) yielding tissue/blood concentration ratios of 3.5 in pregnant ewes and 3.1 in nonpregnant ewes, not 3.3 and 3.5, respectively. This suggests lesser, not greater, sensitivity of the pregnant myocardium to the depressant effects of bupivacaine. Their data also suggest greater myocardial uptake of bupivacaine in the pregnant ewe (higher tissue concentration of drug at lower plasma levels).

Their data do suggest an alternate explanation for the enhanced sensitivity of pregnant ewes to bupivacaine toxicity, *i.e.*, significantly lower brain concentrations of bupivacaine at circulatory collapse in gravid ewes. Brain/

blood concentration ratios at circulatory collapse are 1.9 in nonpregnant ewes *versus* 1.3 in pregnant ewes, suggesting increased CNS sensitivity to bupivacaine toxicity in pregnant ewes. That this could result in circulatory collapse is not unreasonable in light of work by Heavner,<sup>2</sup> showing that very small doses of bupivacaine can cause severe ventricular arrhythmias following intracerebral ventricular injection. Severe terminal ventricular arrhythmias also occurred in the ewes studied by Morishima *et al.*<sup>1</sup> Combining the results of these two studies suggests that the increase in sensitivity to bupivacaine toxicity observed in pregnant ewes may be due not to increased myocardial sensitivity but rather to increased CNS sensitivity.

MARK C. NORRIS, M.D.  
Assistant Professor of Anesthesiology  
Co-Director, Obstetric Anesthesia  
Thomas Jefferson University  
Philadelphia, Pennsylvania 19107

#### REFERENCES

1. Morishima HO, Pederson H, Finster M, Hiraoka H, Tsuji A, Feldman HS, Arthur GR, Covino BG: Bupivacaine toxicity in pregnant and nonpregnant ewes. *ANESTHESIOLOGY* 63:134-139, 1985
2. Heavner JG: Cardiac dysrhythmias induced by infusion of local anesthetics into the lateral cerebral ventricle of cats. *Anesth Analg* 65:133-138, 1986

(Accepted for publication May 30, 1986.)

Anesthesiology  
65:346-347, 1986

*In reply:*—We thank Dr. Norris for his interest in our article. Our conclusion that enhanced cardiotoxicity of bupivacaine in pregnant sheep may be related to greater sensitivity of the myocardium was based primarily on the fact that nonpregnant animals required approximately twice as much drug and twice as high plasma concentrations of the drug, while the myocardial bupivacaine uptake was similar in pregnant and nonpregnant ewes. The values for bupivacaine concentrations in the heart and for heart-blood concentration ratios, which were not significantly different between groups, were quoted to imply a comparable drug uptake in the heart. The values calculated by Dr. Norris are at variance with ours because he cal-

culated a ratio of means for tissue and blood concentrations of bupivacaine, while we calculated a mean of ratios in individual animals. Similarly, our calculation of mean brain-blood concentration ratios indicates that these were not significantly different ( $2.1 \pm 0.2$  in the nonpregnant, and  $1.6 \pm 0.3$  in the pregnant). Even though the absolute concentration of bupivacaine was lower in the brain of pregnant ewes, it is unlikely that the greater cardiotoxicity noted in these animals was related to brain uptake of the drug.

H. O. MORISHIMA, M.D., PH.D.  
H. PEDERSEN, M.D.



M. FINSTER, M.D.  
G. R. ARTHUR, PH.D.  
B. G. COVINO, PH.D., M.D.

*Departments of Anesthesiology, Obstetrics and Gynecology  
College of Physicians and Surgeons*

*Columbia University  
New York, New York  
and  
Brigham and Women's Hospital  
Harvard Medical School  
Boston, Massachusetts*

*(Accepted for publication May 30, 1986.)*

Anesthesiology  
65:347, 1986

### Securing an Endotracheal Tube

*To the Editor:*—Endotracheal tubes are often secured with ties. Two knots are commonly used: one around the tube itself, and a second to secure the tube to the patient.

Most practitioners use a square knot (sometimes mistakenly a granny knot) around the endotracheal tube. Use of the square knot can present two problems. First, the initial overhand knot (half of the square) can loosen easily. If this is not corrected before the second half of the square is placed, the tube will slip or slide beneath the knot. When a square knot is tied properly, it is difficult (if not impossible if it is a granny) to loosen if the tube requires repositioning.

Surgeons, sailors, and even boy scouts are taught: 1) knots were designed to help, not hinder; and 2) experience mates the "knot to the job." Accordingly, I believe that a knot known as a clove hitch is the "right" knot for securing endotracheal tubes.

The clove hitch is simple, straightforward, and easy to tie. When placing the knot around an object like an endotracheal tube, it may be tied as shown in figure 1. Advantages of the knot include: 1) it can be loosely placed and then tightened after correct positioning of the tube is confirmed; 2) if the knot loosens, it can be retightened by pulling on opposite standing parts; and 3) the same knot can be loosened and again used to secure the tube should auscultation or roentgenogram indicate that repositioning is necessary.

JAMES G. GONZALES, M.D.  
*Department of Anesthesiology  
University Hospitals  
Case Western Reserve University  
2078 Abington Road  
Cleveland, Ohio 44106*

*(Accepted for publication May 30, 1986.)*

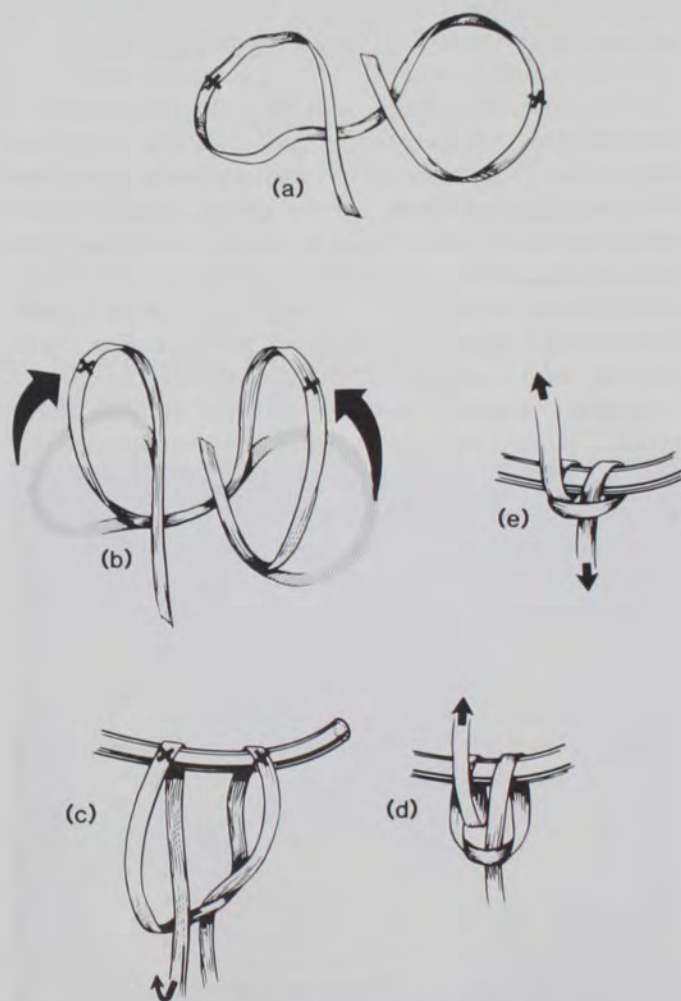

FIG. 1. A-E. Steps for tying a clove hitch to secure an endotracheal tube.
